# Supplementary material
Source: Springer Nature journal article supplement (https://www.springermedizin.de/resource/supplementary/12916_2014_987_MOESM3_ESM.pdf/9598962)

**Supplemental Figure 2. Network of included RCTs for the base case PFS based on Kaplan Meier curves: Risk of bias summary**

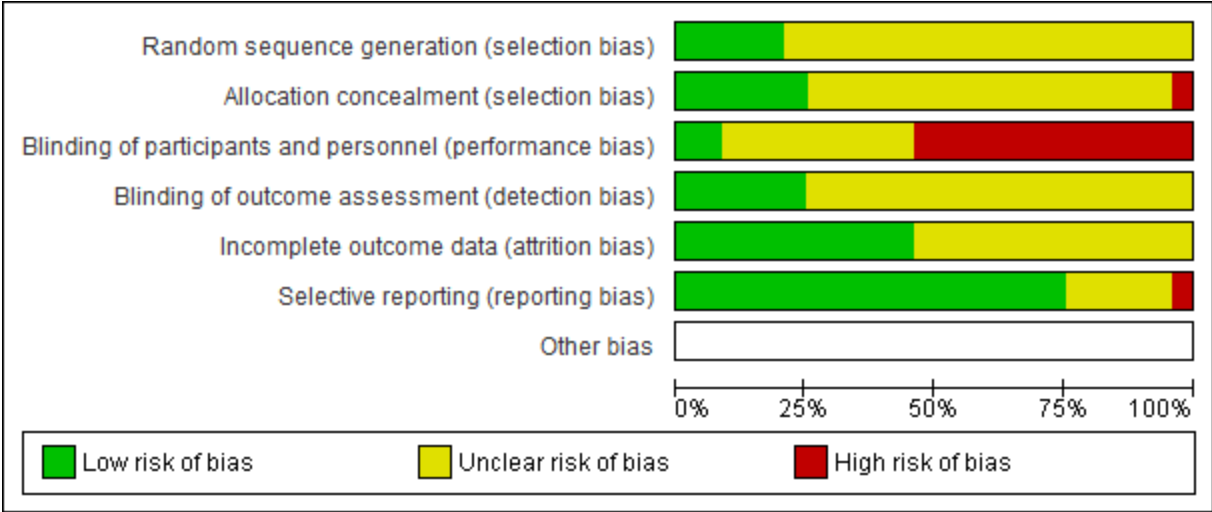

Supplement: MOESM3 [file 9598962]
